# Supplementary material
Source: publisher site journal article supplement (https://www.dovepress.com/article/565401)
Supplement: Supplementary file 1 [file 565401%20Revised%20Figure%20S1-S2.pdf]

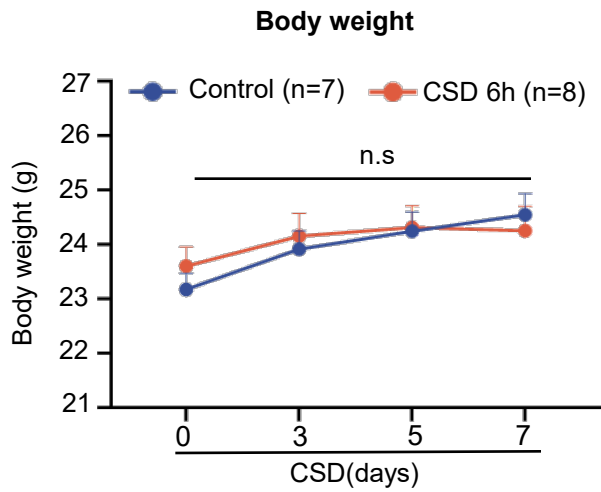

Fig. S1 Body weight changes during CSD. Body weight was monitored in Control (n = 7) and CSD 6h (n = 8) groups at days 0, 3, 5, and 7. Two-way RM ANOVA showed a significant treatment  $\times$  time interaction ( $P = 0.0122$ ). Šidák's multiple comparisons test revealed no significant difference between groups ( $P > 0.05$  for all comparisons). Data are presented as mean  $\pm$  SEM. n.s., not significant. Abbreviations: CSD, chronic sleep deprivation.

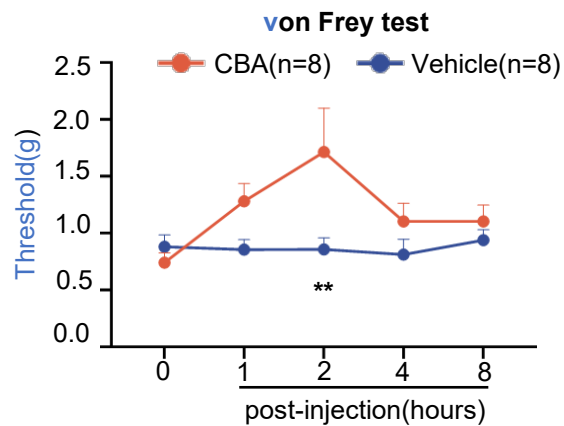

Fig. S2 CBA alleviates mechanical hypersensitivity in the PINC model. After PINC induction, mechanical withdrawal thresholds were measured immediately before drug administration (0 h) and at 1, 2, 4, and 8 h post-injection of CBA (n = 8) or vehicle (n = 8). Two-way RM ANOVA revealed a significant treatment  $\times$  time interaction ( $P = 0.0040$ ). Šídák's multiple comparisons test showed that CBA significantly increased withdrawal thresholds at 2 hours post-injection compared to vehicle ( $P = 0.0029$ ). Data are presented as mean  $\pm$  SEM. \*\* $P < 0.01$  vs. vehicle. Abbreviations: CBA, carbidopa; PINC, plantar incision.
